# Supplementary material for: Recovering staff, recovering services: massive-online support for recovering a paediatric service using Lean and compassionate communication
Source: PubMed Central journal article supplement — BMJ Open Qual. 2022 Jun 23;11(2):e001914. doi: 10.1136/bmjoq-2022-001914 (PMC9234906; doi:10.1136/bmjoq-2022-001914), 2022-06-23
Supplement: bmjoq-2022-001914supp001.pdf [file bmjoq-2022-001914supp001.pdf]

# Quality Improvement Report

## Recovering staff, recovering services: Massive-online support for recovering a paediatric service using Lean and compassionate communication - Supplementary Data

## 1 Glossary of terms

|                   |                                                                                           |
|-------------------|-------------------------------------------------------------------------------------------|
| ICBD              | The Improvement Capability Building and Delivery Group within NHS England and Improvement |
| MOOC              | Massive-open-online-course                                                                |
| NHS               | National Health Service                                                                   |
| NHSE&I            | NHS England and Improvement                                                               |
| PAS               | Patient administration system                                                             |
| PDSA              | Plan, do, study, act learning and improvement framework                                   |
| PTL               | Primary targeting list                                                                    |
| SaLT              | Speech and language therapy                                                               |
| SCD               | Social communication disorder                                                             |
| S-QI              | Systematic quality improvement                                                            |
| SQUIRE Guidelines | Standards for Quality Improvement Reporting Excellence Guidelines                         |

## 2 Overview of target-conditions and PDSA cycles

| Target Condition and PDSA Number | Description of target condition and PDSA cycles                                                                                                                        |
|----------------------------------|------------------------------------------------------------------------------------------------------------------------------------------------------------------------|
| Target Condition 1               | Aimed to unburden clinical staff and release time for care.                                                                                                            |
| PDSA 1                           | Removed admin tasks from clinicians with the improvement project lead taking responsibility on a temporary basis.                                                      |
| Target Condition 2               | Aimed to reduce administrative processing time                                                                                                                         |
| PDSA 2                           | Released admin time by using laptops to access information which were previously accessed manually.                                                                    |
| Target Condition 3               | Aimed to establish a cleansed, validated PTL using released admin time.                                                                                                |
| Target Condition 4               | Aimed to recover the backlog of waits                                                                                                                                  |
| PDSA 3                           | Used released clinical time to prioritise patients and run additional clinical assessment panels.                                                                      |
| Target Condition 5               | Aimed to ensure future referrals could be seen quickly.                                                                                                                |
| PDSA 4                           | Used a generic email inbox as a single point of contact.<br><br>Developed new administrative standard work processes to follow-up referrals and schedule appointments. |
